# Supplementary material for: Synthesis, characterization, and reactivity studies of a water-soluble bis(alkoxo)(carboxylato)-bridged diMnIIIcomplex modeling the active site in catalase
Source: Royal Society of Chemistry journal article supplement (doi:10.1039/c4dt01907e), 2014-09-19

## ELECTRONIC SUPPLEMENTARY INFORMATION

### Synthesis, Characterization, and Reactivity Studies of a Hydrosoluble Bis(alkoxo)(carboxylato)-bridged $\text{DiMn}^{\text{III}}$ Complex Modeling the Active Site in Catalase

Claudia Palopoli, Carine Duhayon, Jean-Pierre Tuchagues, Sandra Signorella\*

**Figure S1.** Negative mode ESI-mass spectra of **1** in (a) methanol, (b)  $\text{H}_2\text{O}$  and (c)  $\text{Et}_3\text{N}/\text{Et}_3\text{NH}^+$  buffer of pH 11.

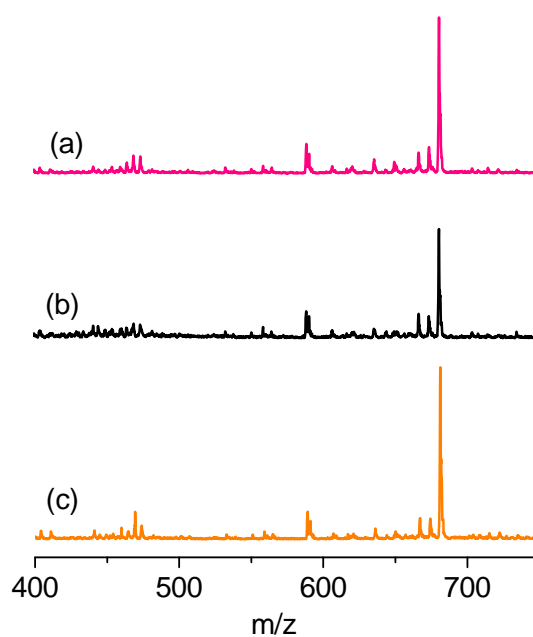

**Figure S2.** Electronic spectra of **1** in water registered at different times.  $[1] = 6.5 \times 10^{-2}$  mM.

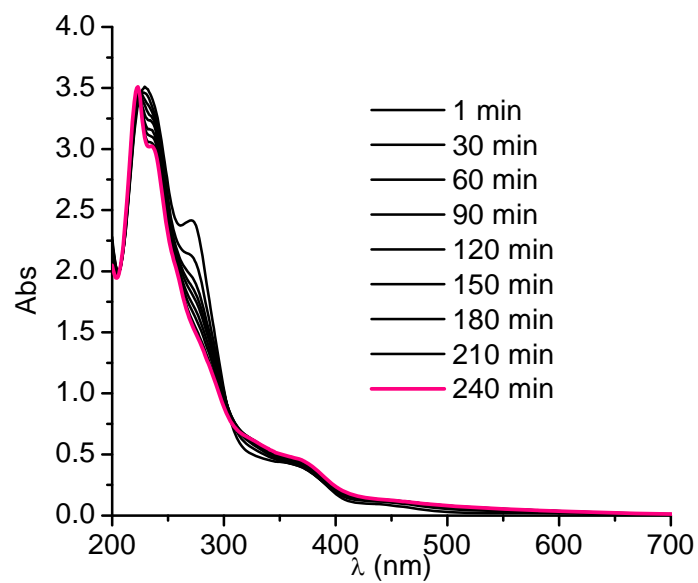

**Figure S3.**  $^1\text{H}$  NMR spectra of **1** in  $\text{D}_4$ -methanol (600  $\mu\text{L}$ ) and after addition of increasing amounts of  $\text{D}_3\text{CCO}_2\text{Na}$ .  $[1] = 14$  mM.

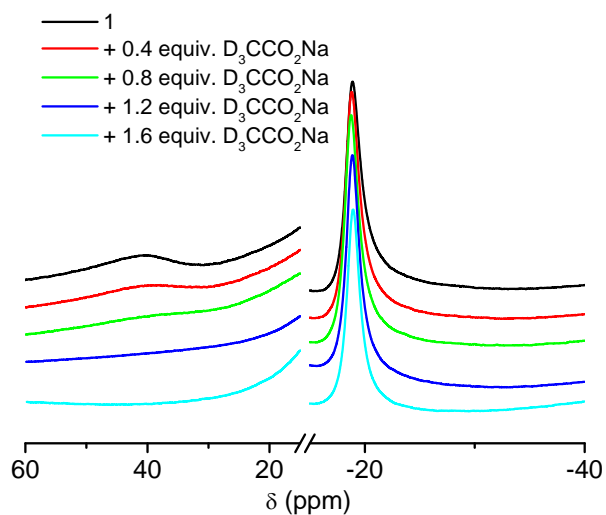

**Figure S4.**  $^1\text{H}$  NMR spectra of **1** in  $\text{D}_4$ -methanol (600  $\mu\text{L}$ ) and after addition of increasing amounts of  $\text{D}_2\text{O}$ .  $[\mathbf{1}] = 20 \text{ mM}$ .

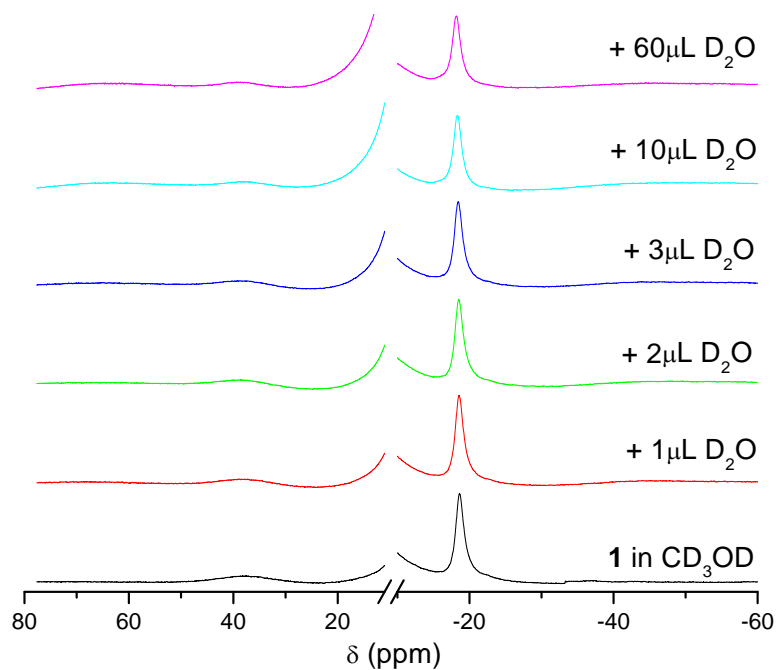

**Figure S5.** Time-dependence of  $\text{O}_2$  evolution after successive additions of 130 equiv of  $\text{H}_2\text{O}_2$  to a DMF solution of **1** (1.5 mM).  $T = 298 \text{ K}$ .

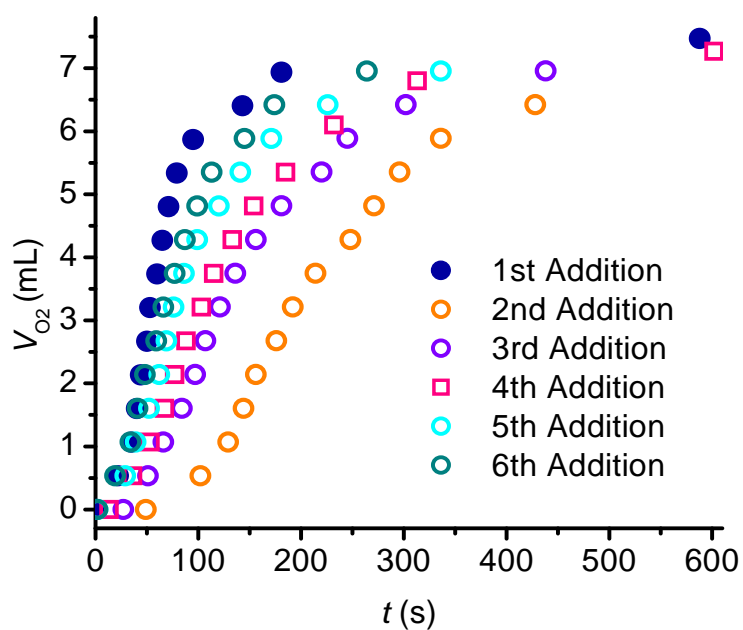

Supplement: c4dt01907e1.pdf [file c4dt01907e1.pdf]
